# Supplementary material for: Ensembles of uncertain mathematical models can identify network response to therapeutic interventions
Source: Royal Society of Chemistry journal article supplement (doi:10.1039/b920693k), 2010-09-16
Supplement: b920693k.pdf [file b920693k.pdf]

**Table S1:** Extended reactions and parameter values used in this coagulation model. The model consists of 193 protein or protein complexes and 301 interactions. This model is an extension of the published extrinsic pathway model (38). New reactions, e.g., the activation of platelet by thrombin through PARs, the release of ADP and TXA2 from activated platelets, platelet activation by ADP and TXA2, the intrinsic pathway reactions, were added to the model. The kinetics of binding and reaction interactions are assumed to follow mass action rate laws where  $k^+$  denotes the on-rate constant,  $k^-$  denotes the off-rate constant and  $k_c$  denotes the catalytic rate constants. All binding interactions are assumed to be reversible. Values for the kinetic parameters and network structure were taken from the literature, see (20, 30, 62, 66–70, 72–74, 76, 77, 83–115).

| Reaction                                                 | $k^+$ ( $AU^{-1}s^{-1}$ )                     | $k^-$ ( $s^{-1}$ )                             | $k_c$ ( $s^{-1}$ )                             | Source   |
|----------------------------------------------------------|-----------------------------------------------|------------------------------------------------|------------------------------------------------|----------|
| VII+TF $\rightleftharpoons$ VII-TF                       | $3.50 \times 10^{-2} \pm 2.24 \times 10^{-2}$ | $4.91 \times 10^{-3} \pm 1.03 \times 10^{-3}$  | –                                              | (73)     |
| VIIa+TF $\rightleftharpoons$ VIIa-TF                     | $4.59 \times 10^{-2} \pm 9.26 \times 10^{-3}$ | $5.28 \times 10^{-3} \pm 1.82 \times 10^{-3}$  | –                                              | (73)     |
| Xa+VII-TF $\rightleftharpoons$ Xa-VII-TF                 | $4.45 \times 10^{-3} \pm 1.23 \times 10^{-3}$ | $8.14 \times 10^{-1} \pm 3.44 \times 10^{-1}$  | –                                              | (73)     |
| Xa-VII-TF $\rightarrow$ VIIa-TF + Xa                     | –                                             | –                                              | $3.35 \times 10^{-3} \pm 1.42 \times 10^{-3}$  | (73)     |
| IIa+VII-TF $\rightleftharpoons$ IIa-VII-TF               | $3.11 \times 10^{-4} \pm 1.26 \times 10^{-4}$ | $8.46 \times 10^{-1} \pm 4.74 \times 10^{-1}$  | –                                              | (73)     |
| IIa-VII-TF $\rightarrow$ VIIa-TF + IIa                   | –                                             | –                                              | $3.52 \times 10^{-4} \pm 6.92 \times 10^{-5}$  | (73)     |
| X+VII-TF $\rightleftharpoons$ X-VIIa-TF                  | $9.35 \times 10^{-2} \pm 2.42 \times 10^{-2}$ | $6.19 \pm 1.53$                                | –                                              | (86)     |
| X-VII-TF $\rightarrow$ VIIa-TF + Xa                      | –                                             | –                                              | $1.50 \pm 4.20 \times 10^{-1}$                 | (86)     |
| IX+VIIa-TF $\rightleftharpoons$ IX-VIIa-TF               | $1.53 \times 10^{-1} \pm 9.02 \times 10^{-2}$ | $2.12 \pm 3.94 \times 10^{-1}$                 | –                                              | (86)     |
| IX-VII-TF $\rightarrow$ VIIa-TF + IXa                    | –                                             | –                                              | $3.30 \times 10^{-1} \pm 1.14 \times 10^{-1}$  | (86)     |
| VII+Xa $\rightleftharpoons$ VII-Xa                       | $1.90 \times 10^{-1} \pm 1.20 \times 10^{-1}$ | $8.07 \times 10^{-1} \pm 3.01 \times 10^{-1}$  | –                                              | (73, 77) |
| VII-Xa $\rightarrow$ VIIa + Xa                           | –                                             | –                                              | $5.74 \times 10^{-1} \pm 2.02 \times 10^{-1}$  | (73, 77) |
| VII+IIa $\rightleftharpoons$ VII-IIa                     | $7.75 \times 10^{-2} \pm 4.13 \times 10^{-2}$ | $1.04 \times 10^1 \pm 2.06$                    | –                                              | (73, 77) |
| VII-IIa $\rightarrow$ VIIa + IIa                         | –                                             | –                                              | $4.66 \times 10^{-1} \pm 8.30 \times 10^{-2}$  | (73, 77) |
| V+IIa $\rightleftharpoons$ V-IIa                         | $7.99 \times 10^{-2} \pm 5.09 \times 10^{-2}$ | $4.31 \pm 1.80^1$                              | –                                              | (86)     |
| V-IIa $\rightarrow$ Va + IIa                             | –                                             | –                                              | $3.34 \times 10^{-1} \pm 2.04 \times 10^{-1}$  | (86)     |
| VIII+IIa $\rightleftharpoons$ VIII-IIa                   | $8.58 \times 10^{-2} \pm 1.62 \times 10^{-2}$ | $6.84 \pm 3.95^2$                              | –                                              | (86)     |
| VIII-IIa $\rightarrow$ VIIIa + IIa                       | –                                             | –                                              | $3.37 \pm 3.70 \times 10^{-1}$                 | (86)     |
| Xa + IX $\rightleftharpoons$ Xa-IX                       | $7.37 \times 10^{-2} \pm 2.96 \times 10^{-2}$ | $1.11 \pm 4.59 \times 10^{-1}$                 | –                                              | (74)     |
| Xa-IX $\rightarrow$ Xa + IXa                             | –                                             | –                                              | $2.92 \times 10^{-2} \pm 3.32 \times 10^{-3}$  | (74)     |
| Xa + V $\rightleftharpoons$ Xa-V                         | $9.72 \times 10^{-2} \pm 1.18 \times 10^{-2}$ | $1.57 \pm 1.15$                                | –                                              | (74, 86) |
| Xa-V $\rightarrow$ Xa + Va                               | –                                             | –                                              | $4.06 \times 10^{-2} \pm 7.67 \times 10^{-3}$  | (74, 86) |
| Xa + VIII $\rightleftharpoons$ Xa-VIII                   | $9.77 \times 10^{-2} \pm 2.00 \times 10^{-2}$ | $1.63 \pm 8.04 \times 10^{-1}$                 | –                                              | (74, 86) |
| Xa-VIII $\rightarrow$ Xa + VIIIa                         | –                                             | –                                              | $2.18 \times 10^{-2} \pm 5.35 \times 10^{-3}$  | (74, 86) |
| Xa + II $\rightleftharpoons$ Xa-II                       | $7.70 \times 10^{-6} \pm 2.19 \times 10^{-6}$ | $1.09 \times 10^{-9} \pm 1.51 \times 10^{-10}$ | –                                              | (77)     |
| Xa-II $\rightleftharpoons$ IIa + Xa                      | –                                             | –                                              | $4.98 \times 10^{-6} \pm 2.65 \times 10^{-6}$  | (77)     |
| IX + P9s $\rightleftharpoons$ IX-P9s                     | $8.71 \times 10^{-3} \pm 4.86 \times 10^{-3}$ | $2.23 \times 10^{-2} \pm 7.63 \times 10^{-3}$  | –                                              | (73, 84) |
| IXa + P9s $\rightleftharpoons$ IXa-P9s                   | $3.27 \times 10^{-5} \pm 1.06 \times 10^{-5}$ | $4.74 \times 10^{-3} \pm 1.30 \times 10^{-3}$  | –                                              | (73, 84) |
| IXa + P9s* $\rightleftharpoons$ IXa-P9s*                 | $2.84 \times 10^{-5} \pm 5.78 \times 10^{-6}$ | $4.27 \times 10^{-3} \pm 1.63 \times 10^{-3}$  | –                                              | (73, 84) |
| X + P10s $\rightleftharpoons$ X-P10s                     | $8.93 \times 10^{-2} \pm 4.44 \times 10^{-2}$ | $2.48 \times 10^{-2} \pm 7.30 \times 10^{-3}$  | –                                              | (73, 84) |
| Xa + P10s $\rightleftharpoons$ Xa-P10s                   | $7.90 \times 10^{-2} \pm 2.97 \times 10^{-2}$ | $8.09 \times 10^{-3} \pm 5.85 \times 10^{-3}$  | –                                              | (73, 84) |
| V + P5s $\rightleftharpoons$ V-P5s                       | $6.33 \pm 1.77$                               | $1.42 \times 10^{-1} \pm 4.21 \times 10^{-2}$  | –                                              | (73, 83) |
| Va + P5s $\rightleftharpoons$ Va-P5s                     | $5.51 \pm 1.07$                               | $1.10 \times 10^{-1} \pm 3.29 \times 10^{-2}$  | –                                              | (73, 83) |
| VIII + P8s $\rightleftharpoons$ VIII-P8s                 | $1.59 \times 10^{-1} \pm 1.08 \times 10^{-1}$ | $1.22 \times 10^{-1} \pm 3.48 \times 10^{-2}$  | –                                              | (73, 85) |
| VIIIa + P8s $\rightleftharpoons$ VIIIa-P8s               | $2.07 \times 10^{-2} \pm 1.25 \times 10^{-2}$ | $1.58 \times 10^{-1} \pm 9.01 \times 10^{-2}$  | –                                              | (73, 85) |
| II + P2s $\rightleftharpoons$ II-P2s                     | $8.65 \times 10^{-3} \pm 3.12 \times 10^{-3}$ | $1.06 \times 10^1 \pm 4.96$                    | –                                              | (73)     |
| IIa + P2s $\rightleftharpoons$ IIa-P2s                   | $3.40 \times 10^{-4} \pm 1.58 \times 10^{-4}$ | $1.53 \pm 1.28$                                | –                                              | (73)     |
| PL + Psub $\rightarrow$ AP-Psub                          | –                                             | –                                              | $9.31 \times 10^{-1} \pm 3.99 \times 10^{-1}$  | (73)     |
| PL + Psub $\rightarrow$ PL-Psub                          | $1.76 \times 10^1 \pm 5.00$                   | –                                              | –                                              | (73)     |
| AP + Psub $\rightarrow$ AP-Psub                          | –                                             | –                                              | $1.63 \times 10^{-1} \pm 6.26 \times 10^{-2}$  | (73)     |
| PL + AP $\rightleftharpoons$ PL-AP                       | $5.14 \times 10^{-7} \pm 1.41 \times 10^{-7}$ | $1.09 \pm 4.17 \times 10^{-1}$                 | –                                              | (73)     |
| PL-AP $\rightleftharpoons$ 2AP                           | –                                             | –                                              | $5.97 \times 10^{-7} \pm 1.43 \times 10^{-7}$  | (73)     |
| PL + AP-Psub $\rightleftharpoons$ PL-AP-Psub             | $4.31 \times 10^{-7} \pm 1.71 \times 10^{-7}$ | $1.62 \pm 9.73 \times 10^{-1}$                 | –                                              | (73)     |
| PL-AP-Psub $\rightarrow$ AP + AP-Psub                    | –                                             | –                                              | $8.05 \times 10^{-7} \pm 4.50 \times 10^{-7}$  | (73)     |
| V-P5s + Xa-P10s $\rightleftharpoons$ V-P5s-Xa-P10s       | $2.70 \times 10^{-1} \pm 2.37 \times 10^{-1}$ | $8.31 \times 10^{-1} \pm 4.61 \times 10^{-1}$  | –                                              | (73, 86) |
| V-P5s-Xa-P10s $\rightarrow$ Va-P5s + Xa-P10s             | –                                             | –                                              | $5.58 \pm 1.09$                                | (73, 86) |
| V-P5s + IIa-P2s $\rightleftharpoons$ V-P5s-IIa-P2s       | $1.39 \times 10^{-2} \pm 1.02 \times 10^{-2}$ | $7.73 \times 10^{-1} \pm 5.28 \times 10^{-1}$  | –                                              | (73, 86) |
| V-P5s-IIa-P10s $\rightarrow$ Va-P5s + IIa-P10s           | –                                             | –                                              | $1.23 \times 10^1 \pm 9.74$                    | (73, 86) |
| X-P10s+tenase $\rightleftharpoons$ X-P10s-tenase         | $7.49 \times 10^{-2} \pm 2.43 \times 10^{-2}$ | $1.39 \times 10^{-2} \pm 4.56 \times 10^{-3}$  | –                                              | (73, 86) |
| X-P10s-tenase $\rightarrow$ Xa-P10s + tenase             | –                                             | –                                              | $2.05 \times 10^1 \pm 3.70$                    | (73, 86) |
| X-P10s+tenase* $\rightleftharpoons$ X-P10s-tenase*       | $7.78 \times 10^{-2} \pm 3.06 \times 10^{-2}$ | $1.15 \times 10^{-2} \pm 3.19 \times 10^{-3}$  | –                                              | (73, 86) |
| X-P10s-tenase* $\rightarrow$ Xa-P10s + tenase*           | –                                             | –                                              | $2.17 \times 10^1 \pm 6.59$                    | (73, 86) |
| VIII-P8s + Xa-P10s $\rightleftharpoons$ VIII-P8s-Xa-P10s | $1.03 \times 10^{-1} \pm 2.42 \times 10^{-2}$ | $1.71 \pm 8.09 \times 10^{-1}$                 | –                                              | (73, 86) |
| VIII-P8s-Xa-P10s $\rightarrow$ VIIIa-P8s + Xa-P10s       | –                                             | –                                              | $1.63 \times 10^{-2} \pm 6.08 \times 10^{-32}$ | (73, 86) |
| VIII-P8s + IIa-P2s $\rightleftharpoons$ VIII-P8s-IIa-P2s | $9.81 \times 10^{-2} \pm 3.20 \times 10^{-2}$ | $1.28 \times 10^1 \pm 2.95^2$                  | –                                              | (73, 86) |

Continued on next page

| Reaction                                                     | $k^+$ ( $AU^{-1}s^{-1}$ )                     | $k^-$ ( $s^{-1}$ )                              | $k_c$ ( $s^{-1}$ )                             | Source   |
|--------------------------------------------------------------|-----------------------------------------------|-------------------------------------------------|------------------------------------------------|----------|
| VIII-P8s-Ila-P10s $\rightarrow$ VIIIa-P8s + Ila-P10s         | -                                             | -                                               | $8.76 \times 10^{-1} \pm 1.39 \times 10^{-1}$  | (73, 86) |
| II-P2s + prothrombinase $\equiv$ II-P2s-prothrombinase       | $1.64 \times 10^{-1} \pm 1.18 \times 10^{-1}$ | $4.13 \times 10^{-2} \pm 1.40 \times 10^{-21}$  | -                                              | (73, 86) |
| II-P2s-prothrombinase $\rightarrow$ Ila-P2s + prothrombinase | -                                             | -                                               | $1.20 \times 10^1 \pm 8.07^1$                  | (73, 86) |
| VIIIa-P8s + IXa-P9s $\equiv$ tenase                          | $8.82 \times 10^{-2} \pm 5.02 \times 10^{-2}$ | $2.80 \times 10^{-1} \pm 1.88 \times 10^{-1}$   | -                                              | (73, 86) |
| VIIIa-P8s + IXa-P9s* $\equiv$ tenase*                        | $9.16 \times 10^{-2} \pm 1.55 \times 10^{-2}$ | $3.06 \times 10^{-1} \pm 1.63 \times 10^{-1}$   | -                                              | (73, 86) |
| Va-P5s + Xa-P10s $\equiv$ prothrombinase                     | $1.07 \pm 3.10 \times 10^{-1}$                | $8.83 \times 10^{-1} \pm 2.89 \times 10^{-1}$   | -                                              | (73, 86) |
| Xa-P10s + IX-P9s $\equiv$ Xa-P10s-IX-P9s                     | $7.29 \times 10^{-4} \pm 2.11 \times 10^{-4}$ | $4.05 \pm 3.82$                                 | -                                              | (74)     |
| Xa-P10s-IX-P9s $\rightarrow$ Xa-P10s + IXa-P9s               | -                                             | -                                               | $2.05 \times 10^{-2} \pm 5.62 \times 10^{-3}$  | (74)     |
| APC + VIIIa-P8s $\equiv$ APC-VIIIa-P8s                       | $9.31 \times 10^{-2} \pm 4.03 \times 10^{-2}$ | $1.51 \pm 5.84 \times 10^{-1}$                  | -                                              | (73)     |
| APC-VIIIa-P8s $\rightarrow$ APC+VIIIa-P8s-i                  | -                                             | -                                               | $5.68 \times 10^{-1} \pm 1.28 \times 10^{-1}$  | (73)     |
| APC + Va-P8s $\equiv$ APC-Va-P8s                             | $1.63 \times 10^{-1} \pm 7.45 \times 10^{-2}$ | $1.31 \pm 4.51 \times 10^{-1}$                  | -                                              | (73)     |
| APC-Va-P8s $\rightarrow$ APC+Va-P8s-i                        | -                                             | -                                               | $3.46 \times 10^{-1} \pm 1.69 \times 10^{-3}$  | (73)     |
| APC + prothrombinase $\equiv$ APC-prothrombinase             | $8.26 \times 10^{-2} \pm 4.55 \times 10^{-2}$ | $1.19 \pm 4.47 \times 10^{-1}$                  | -                                              | (73, 76) |
| APC-prothrombinase $\rightarrow$ APC + prothrombinase-i      | -                                             | -                                               | $3.78 \times 10^{-1} \pm 1.70 \times 10^{-1}$  | (73, 76) |
| APC + tenase $\equiv$ APC-tenase                             | $1.32 \times 10^{-1} \pm 2.42 \times 10^{-2}$ | $8.69 \times 10^{-1} \pm 4.55 \times 10^{-1}$   | -                                              | (73, 76) |
| APC-tenase $\rightarrow$ APC + tenase-i                      | -                                             | -                                               | $4.66 \times 10^{-1} \pm 8.94 \times 10^{-2}$  | (73, 76) |
| APC + tenase* $\equiv$ APC-tenase*                           | $1.55 \times 10^{-1} \pm 1.55 \times 10^{-2}$ | $9.10 \times 10^{-1} \pm 2.98 \times 10^{-1}$   | -                                              | (73, 76) |
| APC-tenase* $\rightarrow$ APC + tenase*-i                    | -                                             | -                                               | $4.17 \times 10^{-1} \pm 1.63 \times 10^{-1}$  | (73, 76) |
| TFPI + Xa $\equiv$ TFPI-Xa                                   | $2.04 \times 10^{-3} \pm 6.29 \times 10^{-4}$ | $8.18 \times 10^{-4} \pm 7.55 \times 10^{-4}$   | -                                              | (73, 86) |
| TFPI-Xa + VIIa-TF $\equiv$ TFPI-Xa-VIIa-TF                   | $9.78 \times 10^{-4} \pm 1.34 \times 10^{-4}$ | $1.01 \times 10^{-3} \pm 3.36 \times 10^{-4}$   | -                                              | (73)     |
| TFPI + X-VIIa-TF $\equiv$ TFPI-X-VIIa-TF                     | $8.25 \times 10^{-4} \pm 1.82 \times 10^{-4}$ | $2.11 \times 10^{-4} \pm 1.52 \times 10^{-4}$   | -                                              | (77)     |
| Ila $\rightarrow$ Ila-i                                      | -                                             | -                                               | $4.76 \times 10^{-4} \pm 1.25 \times 10^{-4}$  | (77)     |
| ATIII + IXa $\equiv$ ATIII-IXa                               | $7.12 \times 10^{-7} \pm 4.50 \times 10^{-7}$ | $8.45 \times 10^{-10} \pm 3.35 \times 10^{-10}$ | -                                              | (73, 77) |
| ATIII-IXa $\rightarrow$ ATIII+IXa-i                          | -                                             | -                                               | $3.71 \times 10^{-7} \pm 1.55 \times 10^{-7}$  | (73, 77) |
| ATIII + Xa $\equiv$ ATIII-Xa                                 | $1.52 \times 10^{-4} \pm 5.94 \times 10^{-5}$ | $6.58 \times 10^{-10} \pm 4.30 \times 10^{-10}$ | -                                              | (73, 77) |
| ATIII-Xa $\rightarrow$ ATIII+Xa-i                            | -                                             | -                                               | $3.76 \times 10^{-5} \pm 5.52 \times 10^{-6}$  | (73, 77) |
| ATIII + Ila $\equiv$ ATIII-Ila                               | $2.27 \times 10^{-6} \pm 4.98 \times 10^{-7}$ | $1.00 \times 10^{-9} \pm 2.08 \times 10^{-10}$  | -                                              | (73, 77) |
| ATIII-Ila $\rightarrow$ ATIII+Ila-i                          | -                                             | -                                               | $2.90 \times 10^{-5} \pm 2.04 \times 10^{-5}$  | (73, 77) |
| ATIII + VIIa-TF $\equiv$ VIIIa-TF-ATIII                      | $2.34 \times 10^{-7} \pm 8.72 \times 10^{-8}$ | $8.14 \times 10^{-10} \pm 3.49 \times 10^{-10}$ | -                                              | (77)     |
| PC + Ila $\equiv$ PC-Ila                                     | $5.70 \times 10^{-7} \pm 3.69 \times 10^{-7}$ | $1.60 \times 10^{-9} \pm 8.05 \times 10^{-10}$  | -                                              | (76, 87) |
| PC-Ila $\rightarrow$ APC + Ila                               | -                                             | -                                               | $3.10 \times 10^{-4} \pm 2.06 \times 10^{-4}$  | (76, 87) |
| Ila + TM $\equiv$ Ila-TM                                     | $2.70 \times 10^{-2} \pm 8.06 \times 10^{-3}$ | $8.56 \times 10^{-2} \pm 7.92 \times 10^{-2}$   | -                                              | (87)     |
| Ila-TM + PC $\equiv$ Ila-TM-PC                               | $9.08 \times 10^{-5} \pm 5.56 \times 10^{-5}$ | $3.31 \times 10^{-1} \pm 1.93 \times 10^{-1}$   | -                                              | (87)     |
| Ila-TM-PC $\rightarrow$ Ila-TM + APC                         | -                                             | -                                               | $3.08 \times 10^1 \pm 1.69 \times 10^1$        | (87)     |
| Ila + PAR1-PL $\equiv$ Ila-PAR1-PL                           | $6.15 \times 10^{-1} \pm 1.69 \times 10^{-1}$ | $8.51 \pm 2.69$                                 | -                                              | (66, 67) |
| Ila + PAR1-PL-Psub $\equiv$ Ila-PAR1-PL-Psub                 | $1.48 \times 10^{-1} \pm 6.63 \times 10^{-2}$ | $3.68 \pm 2.52$                                 | -                                              | (66, 67) |
| Ila-PAR1-PL $\rightarrow$ AP + Ila                           | -                                             | -                                               | $1.71 \times 10^{-2} \pm 1.27 \times 10^{-2}$  | (66, 67) |
| Ila-PAR1-PL-Psub $\rightarrow$ AP-Psub + Ila                 | -                                             | -                                               | $3.62 \times 10^{-2} \pm 1.08 \times 10^{-2}$  | (66, 67) |
| Ila + PAR4-PL $\equiv$ Ila-PAR4-PL                           | $1.87 \times 10^{-1} \pm 2.70 \times 10^{-2}$ | $4.39 \pm 8.28 \times 10^{-1}$                  | -                                              | (66, 67) |
| Ila + PAR4-PL-Psub $\equiv$ Ila-PAR4-PL-Psub                 | $5.97 \times 10^{-1} \pm 2.19 \times 10^{-1}$ | $1.97 \pm 6.77 \times 10^{-1}$                  | -                                              | (66, 67) |
| Ila-PAR4-PL $\rightarrow$ AP + Ila                           | -                                             | -                                               | $2.75 \times 10^{-1} \pm 7.35 \times 10^{-2}$  | (66, 67) |
| Ila-PAR4-PL-Psub $\rightarrow$ AP-Psub + Ila                 | -                                             | -                                               | $1.81 \pm 1.18$                                | (66, 67) |
| AP $\rightarrow$ APs + ADP                                   | -                                             | -                                               | $1.39 \times 10^{-6} \pm 7.78s \times 10^{-7}$ | (68)     |
| AP $\rightarrow$ APs + TXA2                                  | -                                             | -                                               | $1.10 \times 10^{-6} \pm 2.73 \times 10^{-7}$  | (68)     |
| AP $\rightarrow$ APs + I                                     | -                                             | -                                               | $8.49 \times 10^{-7} \pm 2.96 \times 10^{-7}$  | (68)     |
| AP-Psub $\rightarrow$ APs + ADP                              | -                                             | -                                               | $1.33 \times 10^{-3} \pm 6.85 \times 10^{-4}$  | (68)     |
| AP-Psub $\rightarrow$ APs + TXA2                             | -                                             | -                                               | $2.94 \times 10^{-3} \pm 2.70 \times 10^{-3}$  | (68)     |
| AP-Psub $\rightarrow$ APs + I                                | -                                             | -                                               | $7.88 \times 10^{-4} \pm 1.55 \times 10^{-4}$  | (76)     |
| ADP + PL $\equiv$ ADP-PL                                     | $2.68 \times 10^{-7} \pm 6.25 \times 10^{-8}$ | $7.45 \times 10^{-1} \pm 3.92 \times 10^{-1}$   | -                                              | (68)     |
| ADP-PL $\rightarrow$ AP + ADP                                | -                                             | -                                               | $1.95 \times 10^{-7} \pm 1.04 \times 10^{-7}$  | (68)     |
| TXA2 + PL $\equiv$ TXA2-PL                                   | $3.11 \times 10^{-1} \pm 4.34 \times 10^{-1}$ | $1.53 \pm 7.98 \times 10^{-1}$                  | -                                              | (68)     |
| TXA2-PL $\rightarrow$ AP + TXA2                              | -                                             | -                                               | $2.20 \times 10^{-2} \pm 6.72 \times 10^{-3}$  | (68)     |
| ADP + PL-Psub $\equiv$ ADP-PL-Psub                           | $2.75 \times 10^{-2} \pm 6.88 \times 10^{-3}$ | $7.16 \times 10^{-3} \pm 4.10 \times 10^{-3}$   | -                                              | (68)     |
| ADP-PL-Psub $\rightarrow$ AP-Psub + ADP                      | -                                             | -                                               | $2.49 \times 10^{-3} \pm 9.97 \times 10^{-4}$  | (68)     |
| TXA2 + PL-Psub $\equiv$ TXA2-PL-Psub                         | $1.23 \times 10^{-2} \pm 5.92 \times 10^{-3}$ | $6.28 \times 10^{-1} \pm 2.24 \times 10^{-1}$   | -                                              | (68)     |
| TXA2-PL-Psub $\rightarrow$ AP-Psub + TXA2                    | -                                             | -                                               | $1.95 \times 10^{-2} \pm 6.52 \times 10^{-3}$  | (68)     |
| Ila + I $\equiv$ Ila-I                                       | $1.66 \times 10^{-2} \pm 5.52 \times 10^{-3}$ | $1.06 \pm 2.71 \times 10^{-1}$                  | -                                              | (76)     |
| Ila-I $\rightarrow$ Ila + Ia                                 | -                                             | -                                               | $4.06 \times 10^{-3} \pm 1.85 \times 10^{-3}$  | (76)     |
| XII+Surface $\equiv$ XII-Surface                             | $1.12 \times 10^{-1} \pm 4.98 \times 10^{-2}$ | $1.19 \times 10^{-1} \pm 5.32 \times 10^{-2}$   | -                                              | (62)     |
| XII-Surface $\rightarrow$ XIIa+Surface                       | -                                             | -                                               | $1.14 \times 10^{-1} \pm 3.07 \times 10^{-2}$  | (62)     |
| XIIa+PK $\equiv$ XIIa-PK                                     | $1.07 \times 10^{-1} \pm 4.52 \times 10^{-2}$ | $9.63 \times 10^{-2} \pm 2.16 \times 10^{-2}$   | -                                              | (62)     |
| XIIa-PK $\rightarrow$ XIIa+ K                                | -                                             | -                                               | $2.11 \times 10^{-1} \pm 1.74 \times 10^{-1}$  | (62)     |
| XII+K $\equiv$ XII-K                                         | $9.56 \times 10^{-2} \pm 3.24 \times 10^{-2}$ | $9.30 \times 10^{-2} \pm 2.50 \times 10^{-2}$   | -                                              | (62)     |
| XII-K $\rightarrow$ XIIa+ K                                  | -                                             | -                                               | $8.52 \times 10^{-2} \pm 1.85 \times 10^{-2}$  | (62)     |
| XIIa+ XII $\equiv$ XIIa-XII                                  | $7.63 \times 10^{-2} \pm 5.59 \times 10^{-2}$ | $3.00 \times 10^{-1} \pm 3.13 \times 10^{-1}$   | -                                              | (62)     |
| XIIa-XII $\rightarrow$ 2XIIa                                 | -                                             | -                                               | $1.61 \times 10^{-1} \pm 8.58 \times 10^{-2}$  | (62)     |
| XIIa+ XI $\equiv$ XIIa-XI                                    | $3.10 \times 10^{-3} \pm 1.25 \times 10^{-3}$ | $1.18 \times 10^{-1} \pm 4.77 \times 10^{-2}$   | -                                              | (62)     |
| XIIa-XI $\rightarrow$ XIIa+Xla                               | -                                             | -                                               | $3.62 \times 10^{-1} \pm 8.72 \times 10^{-2}$  | (62)     |
| XIa + XI $\equiv$ XIa-XI                                     | $1.64 \times 10^{-3} \pm 6.35 \times 10^{-4}$ | $8.02 \times 10^{-2} \pm 3.13 \times 10^{-2}$   | -                                              |          |

Continued on next page

| Reaction                                               | $k^+$ ( $AU^{-1}s^{-1}$ )                     | $k^-$ ( $s^{-1}$ )                              | $k_c$ ( $s^{-1}$ )                            | Source       |
|--------------------------------------------------------|-----------------------------------------------|-------------------------------------------------|-----------------------------------------------|--------------|
| XIa-XI $\rightarrow$ 2*XIa                             | -                                             | -                                               | $1.27 \times 10^{-1} \pm 2.26 \times 10^{-2}$ |              |
| XI + P11s $\rightleftharpoons$ XI-P11s                 | $7.01 \times 10^{-2} \pm 3.73 \times 10^{-3}$ | $6.62 \times 10^{-1} \pm 2.63 \times 10^{-1}$   | -                                             | (69, 70)     |
| XIa + P11s* $\rightleftharpoons$ XIa-P11s*             | $1.59 \times 10^{-1} \pm 1.63 \times 10^{-1}$ | $7.70 \times 10^{-2} \pm 2.71 \times 10^{-2}$   | -                                             | (69, 70)     |
| Ila-P2s + XI-P11s $\rightleftharpoons$ Ila-P2s-XI-P11s | $9.69 \times 10^{-3} \pm 2.77 \times 10^{-3}$ | $2.76 \times 10^{-1} \pm 2.51 \times 10^{-1}$   | -                                             | (72, 88)     |
| Ila-P2s-XI-P11s $\rightarrow$ Ila-P2s + XIa-P11s*      | -                                             | -                                               | $1.63 \pm 3.90 \times 10^{-1}$                | (72, 88)     |
| XIa + IX $\rightleftharpoons$ XIa-IX                   | $1.23 \times 10^{-2} \pm 7.91 \times 10^{-3}$ | $7.39 \times 10^{-2} \pm 4.19 \times 10^{-2}$   | -                                             | (70)         |
| XIa-IX $\rightarrow$ XIa + IXa                         | -                                             | -                                               | $8.19 \pm 1.45$                               | (70)         |
| XIa-P11s* + IX $\rightleftharpoons$ XIa-P11s*-IX       | $1.28 \times 10^{-2} \pm 5.24 \times 10^{-3}$ | $1.38 \times 10^{-1} \pm 5.53 \times 10^{-2}$   | -                                             | (70)         |
| XIa-P11s*-IX $\rightarrow$ XIa-P11s* + IXa             | -                                             | -                                               | $1.11 \times 10^1 \pm 4.93$                   | (70)         |
| tPA+PAI1 $\rightleftharpoons$ tPA-PAI1                 | $1.62 \times 10^{-2} \pm 7.62 \times 10^{-3}$ | $8.83 \times 10^{-3} \pm 1.05 \times 10^{-2}$   | -                                             | (89-92)      |
| uPA+PAI1 $\rightleftharpoons$ uPA-PAI1                 | $2.16 \times 10^{-2} \pm 6.70 \times 10^{-3}$ | $1.43 \times 10^{-3} \pm 8.02 \times 10^{-4}$   | -                                             | (89, 90)     |
| tPA+PAI2 $\rightleftharpoons$ tPA-PAI2                 | $1.23 \times 10^{-4} \pm 4.13 \times 10^{-5}$ | $1.34 \times 10^{-6} \pm 4.64 \times 10^{-7}$   | -                                             | (91, 93)     |
| uPA+PAI2 $\rightleftharpoons$ uPA-PAI2                 | $1.46 \times 10^{-3} \pm 6.23 \times 10^{-4}$ | $7.50 \times 10^{-6} \pm 3.28 \times 10^{-6}$   | -                                             | (93)         |
| PLG+tPA $\rightleftharpoons$ PLG-tPA                   | $1.43 \times 10^{-2} \pm 4.91 \times 10^{-3}$ | $7.46 \times 10^{-2} \pm 3.68 \times 10^{-2}$   | -                                             | (92, 94, 95) |
| PLG-tPA $\rightarrow$ PLA+tPA                          | -                                             | -                                               | $2.08 \pm 5.20 \times 10^{-1}$                | (92, 94, 95) |
| PLG+uPA $\rightleftharpoons$ PLG-uPA                   | $4.05 \times 10^{-3} \pm 1.51 \times 10^{-3}$ | $1.17 \times 10^{-1} \pm 3.92 \times 10^{-2}$   | -                                             | (96)         |
| PLG-uPA $\rightarrow$ PLA+uPA                          | -                                             | -                                               | $5.37 \times 10^1 \pm 3.50 \times 10^1$       | (96)         |
| PLA+A2AP $\rightleftharpoons$ PLA-A2AP                 | $3.54 \times 10^{-2} \pm 9.55 \times 10^{-3}$ | $6.63 \times 10^{-3} \pm 1.98 \times 10^{-3}$   | -                                             | (97-102)     |
| PLA-A2AP $\rightarrow$ PLA+A2AP-inactive               | -                                             | -                                               | $4.84 \times 10^{-3} \pm 1.77 \times 10^{-3}$ | (97-102)     |
| PLA+A2M $\rightleftharpoons$ PLA-A2M                   | $5.58 \times 10^{-4} \pm 1.98 \times 10^{-4}$ | $1.11 \times 10^{-5} \pm 2.82 \times 10^{-6}$   | -                                             | (101-103)    |
| PLA-A2M $\rightarrow$ PLA+A2M-inactive                 | -                                             | -                                               | $1.05 \times 10^{-5} \pm 2.96 \times 10^{-6}$ | (101-103)    |
| FDPs+PLA $\rightleftharpoons$ FDPs-PLA                 | $8.62 \times 10^{-3} \pm 2.64 \times 10^{-3}$ | $8.52 \times 10^{-2} \pm 3.93 \times 10^{-2}$   | -                                             | (104, 105)   |
| Ila+TAFI $\rightleftharpoons$ Ila-TAFI                 | $8.92 \times 10^{-4} \pm 5.71 \times 10^{-4}$ | $8.74 \times 10^{-2} \pm 4.65 \times 10^{-2}$   | -                                             | (106, 107)   |
| Ila-TAFI $\rightarrow$ Ila+TAFIa                       | -                                             | -                                               | $5.79 \times 10^2 \pm 7.50 \times 10^2$       | (106, 107)   |
| Ia+PLA $\rightleftharpoons$ Ia-PLA                     | $6.26 \times 10^{-5} \pm 2.57 \times 10^{-5}$ | $1.71 \times 10^{-1} \pm 9.54 \times 10^{-2}$   | -                                             | (108)        |
| Ia-PLA $\rightarrow$ Ddimer+FDPs+PLA                   | -                                             | -                                               | $2.39 \times 10^{-4} \pm 1.73 \times 10^{-4}$ | (108)        |
| Ia+FDPs-PLA $\rightleftharpoons$ Ia-FDPs-PLA           | $4.98 \times 10^{-5} \pm 2.29 \times 10^{-5}$ | $1.17 \times 10^{-1} \pm 4.42 \times 10^{-2}$   | -                                             | (108)        |
| Ia-FDPs-PLA $\rightarrow$ Ddimer+FDPs+FDPs-PLA         | -                                             | -                                               | $1.06 \times 10^{-3} \pm 3.16 \times 10^{-4}$ | (108)        |
| TAFIa+FDPs $\rightleftharpoons$ TAFIa-FDPs             | $8.40 \times 10^1 \pm 3.04 \times 10^1$       | $1.04 \times 10^{-4} \pm 2.87 \times 10^{-5}$   | -                                             | (104, 105)   |
| H5+ATIII $\rightleftharpoons$ H5-ATIII                 | $3.35 \times 10^{-2} \pm 1.29 \times 10^{-2}$ | $8.83 \times 10^{-1} \pm 3.55 \times 10^{-1}$   | -                                             | (109, 110)   |
| H5-ATIII+Xa $\rightleftharpoons$ H5-ATIII-Xa           | $2.02 \times 10^{-2} \pm 4.84 \times 10^{-3}$ | $7.26 \times 10^{-10} \pm 4.68 \times 10^{-10}$ | -                                             | (109, 110)   |
| H5-ATIII-Xa $\rightarrow$ H5-ATIII+Xa-inactive         | -                                             | -                                               | $5.27 \times 10^{-4} \pm 2.48 \times 10^{-4}$ | (109, 110)   |
| H5-ATIII+Ila $\rightleftharpoons$ H5-ATIII-Ila         | $1.70 \times 10^{-5} \pm 5.70 \times 10^{-6}$ | $1.65 \times 10^{-9} \pm 8.89 \times 10^{-10}$  | -                                             | (109, 110)   |
| H5-ATIII-Ila $\rightarrow$ H5-ATIII+Ila-inactive       | -                                             | -                                               | $4.96 \times 10^{-6} \pm 1.47 \times 10^{-6}$ | (109, 110)   |
| HCII+Ila $\rightleftharpoons$ HCII-Ila                 | $2.77 \times 10^{-7} \pm 1.17 \times 10^{-7}$ | $7.12 \times 10^{-10} \pm 4.07 \times 10^{-10}$ | -                                             | (111-113)    |
| HCII+Ila-P2s $\rightleftharpoons$ HCII-Ila-P2s         | $7.63 \times 10^{-7} \pm 4.52 \times 10^{-7}$ | $1.46 \times 10^{-9} \pm 6.76 \times 10^{-10}$  | -                                             | (111-113)    |
| HCII+DER $\rightleftharpoons$ HCII-DER                 | $9.14 \times 10^{-1} \pm 1.43 \times 10^{-1}$ | $1.04 \times 10^{-9} \pm 3.00 \times 10^{-10}$  | -                                             | (111-113)    |
| HCII-DER+Ila $\rightleftharpoons$ HCII-DER-Ila         | $2.76 \times 10^{-2} \pm 1.06 \times 10^{-2}$ | $7.06 \times 10^{-10} \pm 2.52 \times 10^{-10}$ | -                                             | (111-113)    |
| HCII-DER+Ila-P2s $\rightleftharpoons$ HCII-DER-Ila-P2s | $3.46 \times 10^{-2} \pm 2.40 \times 10^{-2}$ | $7.72 \times 10^{-10} \pm 2.30 \times 10^{-10}$ | -                                             | (111-113)    |
| ARG +Ila $\rightleftharpoons$ ARG-Ila                  | $2.91 \times 10^{-2} \pm 8.23 \times 10^{-3}$ | $2.65 \times 10^{-1} \pm 5.51 \times 10^{-2}$   | -                                             | (111, 112)   |
| ARG +Ila-P2s $\rightleftharpoons$ ARG-Ila-P2s          | $7.87 \times 10^{-2} \pm 5.44 \times 10^{-2}$ | $3.14 \times 10^{-1} \pm 1.42 \times 10^{-1}$   | -                                             | (111, 112)   |
| BIV+Ila $\rightleftharpoons$ BIV-Ila                   | $6.47 \times 10^{-1} \pm 3.13 \times 10^{-1}$ | $5.59 \times 10^{-1} \pm 2.10 \times 10^{-1}$   | -                                             | (111, 112)   |
| BIV-Ila $\rightarrow$ BIV-inactive+Ila                 | -                                             | -                                               | $1.89 \times 10^{-2} \pm 1.37 \times 10^{-2}$ | (111, 112)   |
| BIV+Ila-P2s $\rightleftharpoons$ BIV-Ila-P2s           | $5.07 \times 10^{-1} \pm 1.23 \times 10^{-1}$ | $7.08 \times 10^{-1} \pm 2.70 \times 10^{-1}$   | -                                             | (111, 112)   |
| BIV-Ila-P2s $\rightarrow$ BIV-inactive+Ila-P2s         | -                                             | -                                               | $7.49 \times 10^{-3} \pm 2.90 \times 10^{-3}$ | (111, 112)   |
| LEP+Ila $\rightleftharpoons$ LEP-Ila                   | $3.57 \times 10^{-1} \pm 8.50 \times 10^{-2}$ | $1.20 \times 10^{-5} \pm 4.44 \times 10^{-6}$   | -                                             | (111, 112)   |
| LEP+Ila-P2s $\rightleftharpoons$ LEP-Ila-P2s           | $3.28 \times 10^{-1} \pm 8.56 \times 10^{-2}$ | $1.50 \times 10^{-5} \pm 6.45 \times 10^{-6}$   | -                                             | (111, 112)   |
| H5-ATIII+VIIa $\rightleftharpoons$ H5-ATIII-VIIa       | $2.06 \times 10^{-7} \pm 5.98 \times 10^{-8}$ | $3.20 \times 10^{-9} \pm 3.68 \times 10^{-9}$   | -                                             | (114)        |
| H5-ATIII+VIIa-TF $\rightleftharpoons$ H5-ATIII-VIIa-TF | $2.36 \times 10^{-6} \pm 2.42 \times 10^{-6}$ | $7.37 \times 10^{-10} \pm 4.49 \times 10^{-10}$ | -                                             | (114)        |
| X+VIIa $\rightleftharpoons$ X-VIIa                     | $3.33 \times 10^{-5} \pm 1.23 \times 10^{-5}$ | $9.52 \times 10^{-2} \pm 3.43 \times 10^{-2}$   | -                                             | (20, 30)     |
| X-VIIa $\rightarrow$ Xa+VIIa                           | -                                             | -                                               | $7.01 \times 10^{-5} \pm 2.75 \times 10^{-5}$ | (20, 30)     |
| IX+VIIa $\rightleftharpoons$ IX-VIIa                   | $5.79 \times 10^{-5} \pm 1.89 \times 10^{-5}$ | $1.67 \times 10^{-1} \pm 1.26 \times 10^{-1}$   | -                                             | (20, 30)     |
| IX-VIIa $\rightarrow$ IXa+VIIa                         | -                                             | -                                               | $1.44 \times 10^{-5} \pm 2.84 \times 10^{-6}$ | (20, 30)     |
| APC+PCI $\rightleftharpoons$ APC-PCI                   | $5.20 \times 10^{-6} \pm 1.47 \times 10^{-6}$ | $2.19 \times 10^{-9} \pm 1.51 \times 10^{-9}$   | -                                             | (115)        |
| Ila+PCI $\rightleftharpoons$ Ila-PCI                   | $5.50 \times 10^{-6} \pm 1.00 \times 10^{-6}$ | $1.84 \times 10^{-9} \pm 1.40 \times 10^{-9}$   | -                                             | (115)        |
| Xa+PCI $\rightleftharpoons$ Xa-PCI                     | $1.81 \times 10^{-5} \pm 4.21 \times 10^{-6}$ | $7.49 \times 10^{-10} \pm 2.33 \times 10^{-10}$ | -                                             | (115)        |
| XIa+PCI $\rightleftharpoons$ XIa-PCI                   | $1.23 \times 10^{-4} \pm 4.58 \times 10^{-5}$ | $1.58 \times 10^{-9} \pm 8.79 \times 10^{-10}$  | -                                             | (115)        |
| uPA+PCI $\rightleftharpoons$ uPA-PCI                   | $1.62 \times 10^{-6} \pm 9.00 \times 10^{-7}$ | $1.99 \times 10^{-9} \pm 1.30 \times 10^{-9}$   | -                                             | (115)        |
| tPA+PCI $\rightleftharpoons$ tPA-PCI                   | $6.29 \times 10^{-7} \pm 1.77 \times 10^{-7}$ | $9.13 \times 10^{-10} \pm 1.74 \times 10^{-10}$ | -                                             | (115)        |
| K+PCI $\rightleftharpoons$ K-PCI                       | $7.06 \times 10^{-5} \pm 1.88 \times 10^{-5}$ | $1.10 \times 10^{-9} \pm 3.03 \times 10^{-10}$  | -                                             | (115)        |

**Table S2:** Nomenclature for model symbols.

---

|              |                                                        |
|--------------|--------------------------------------------------------|
| fI/I         | fibrinogen                                             |
| F1a/1a       | fibrin                                                 |
| fII/II       | prothrombin                                            |
| FIIa/IIa     | thrombin                                               |
| fVII/VII     | factor VII                                             |
| FVIIa/VIIa   | activated factor VII                                   |
| fV/V         | factor V                                               |
| FVa/Va       | activated factor V                                     |
| fVIII/VIII   | factor VIII                                            |
| FVIIIa/VIIIa | activated factor VIII                                  |
| fIX/IX       | factor IX                                              |
| FIXa/IXa     | activated factor IX                                    |
| fX/X         | factor X                                               |
| FXa/Xa       | activated factor X                                     |
| fXI/XI       | factor X                                               |
| FXIa/XIa     | activated factor X                                     |
| fXII/XII     | factor X                                               |
| FXIIa/XIIa   | activated factor X                                     |
| PK           | prekallikrein                                          |
| K            | kallikrein                                             |
| TF           | tissue factor                                          |
| TFPI         | tissue factor pathway inhibitor                        |
| ATIII        | antithrombin III                                       |
| PC           | protein C                                              |
| APC          | activated protein C                                    |
| TM           | thrombomodulin                                         |
| PL           | resting platelets                                      |
| AP           | activated platelets                                    |
| Pxs          | activated platelets surface binding sites for factor x |
| tPA          | tissue plasminogen activator                           |
| uPA          | urokinase                                              |
| PLG          | plasminogen                                            |
| PLA          | plasmin                                                |
| A2AP         | alpha-2-antiplasmin precursor                          |
| A2M          | alpha-2-macroglobulin                                  |
| FDPs         | fibrin degradation products                            |
| TAFI         | thrombin-activatable fibrinolysis inhibitor            |
| H5           | heparin                                                |
| HCII         | heparin cofactor II                                    |
| ARG          | argatroban                                             |
| BIV          | bivalirudin                                            |
| LEP          | lepirudin                                              |
| PCI          | protein C inhibitor                                    |

---

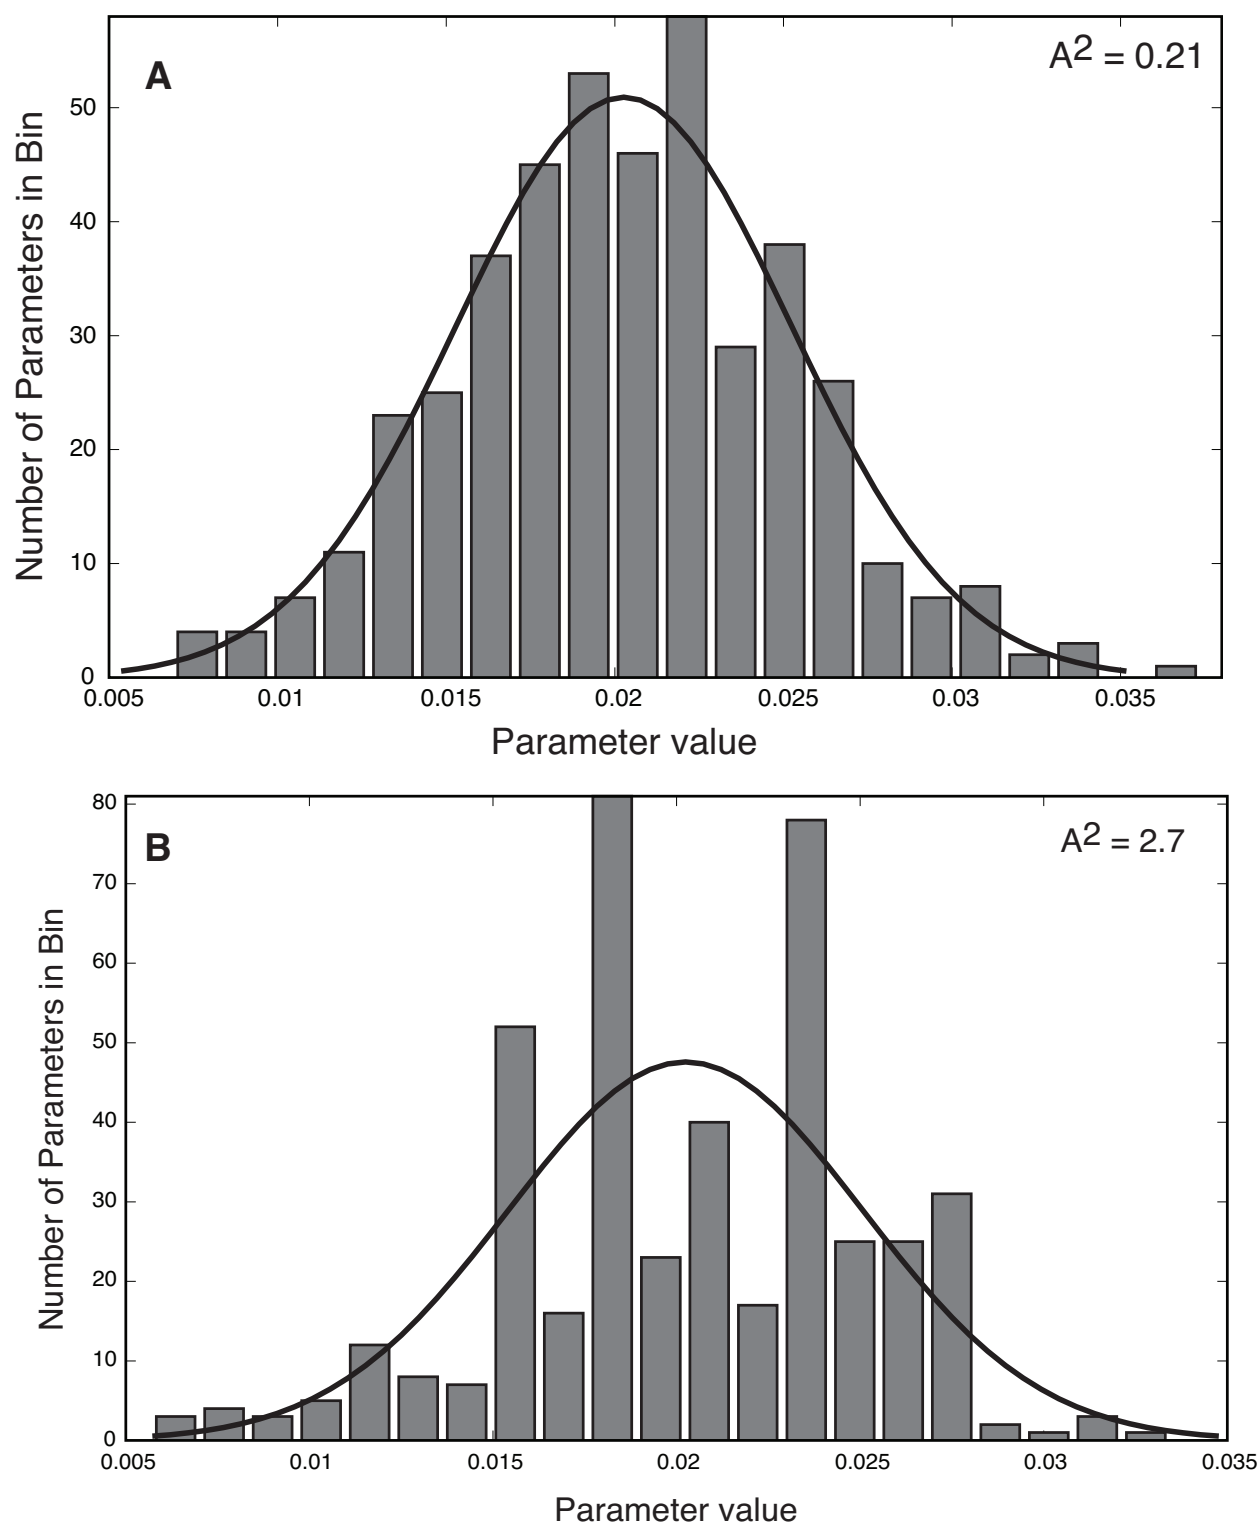

**Fig. S1:** The parameter distributions estimated from the training data were not normal. We performed an Anderson–Darling test on each parameter across all 437 elements of the ensemble. No parameters were normally distributed. **A:** We performed the Anderson–Darling test on a normal distribution constructed using with the mean and variance of the *most normal* parameter from the ensemble. The Anderson–Darling test classified this test distribution as normal, thus, the algorithm was correct. **B:** The most normal distribution had an  $A^2$  statistic equal to 2.7, which is far away from normal. Even when corrected for sample size, the  $A^2$  statistic suggested the distributions were not normal.

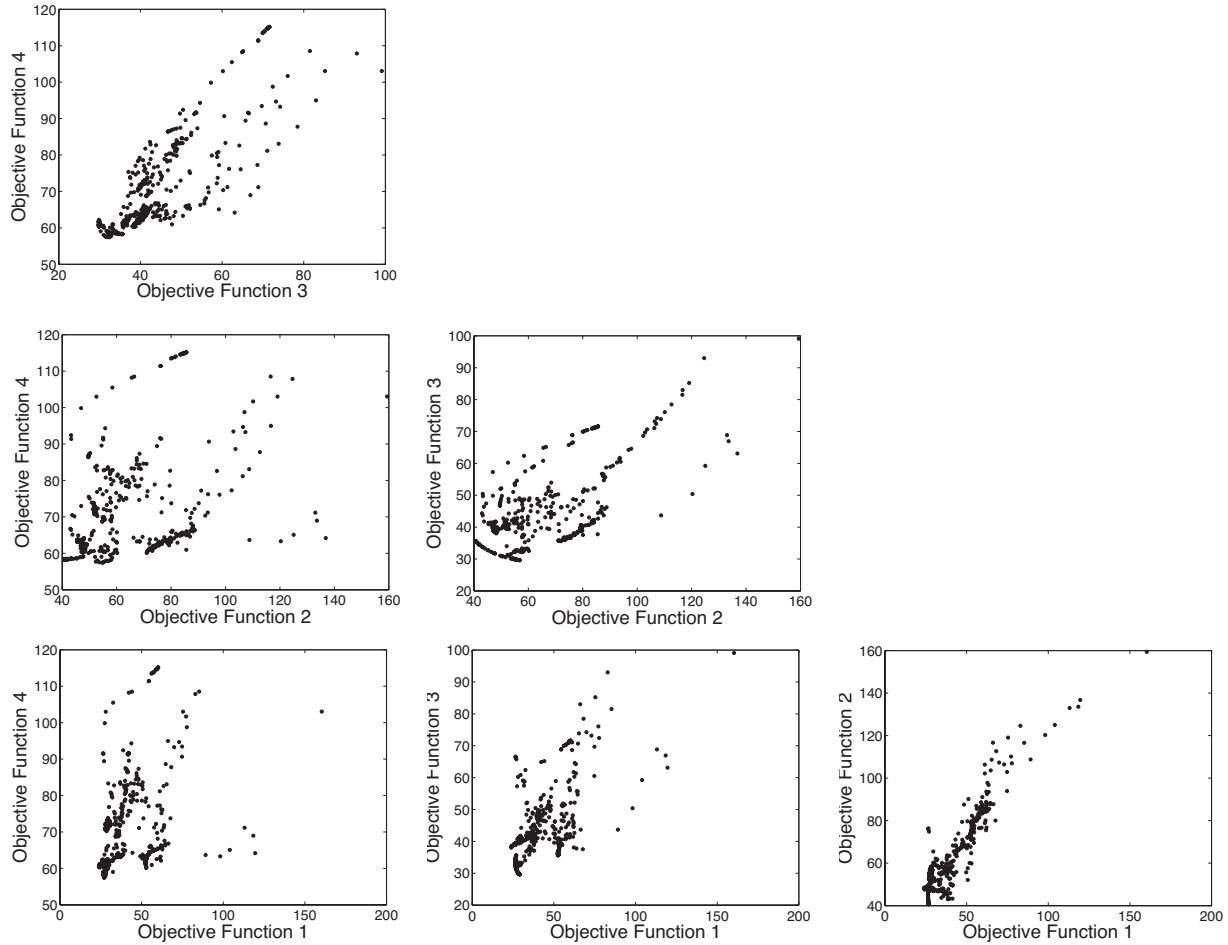

**Fig. S2:** Comparison of the objective function values for the training data used to estimate the model parameters. Objective 1,2,3 and 4 denote Fig. 1A, 1B, 1C and 1D from the Allen *et al.* (22). We compared the values of the four objective functions across the ensemble. For certain objective functions, e.g., O1 and O2 there was a linear relationship. Thus, models that performed well relative to O1 also performed well relative to O2. However, this was not universally true. There was a clear trade-off between O2 and O4. Models that performed well with O2 performed poorly relative to O4. Similarly, O1 versus O4 also showed a trade-off. Taken together, these results suggest that different models performed best relative to individual training data sets. Assembling these models into an ensemble allowed a single model family to describe more data.

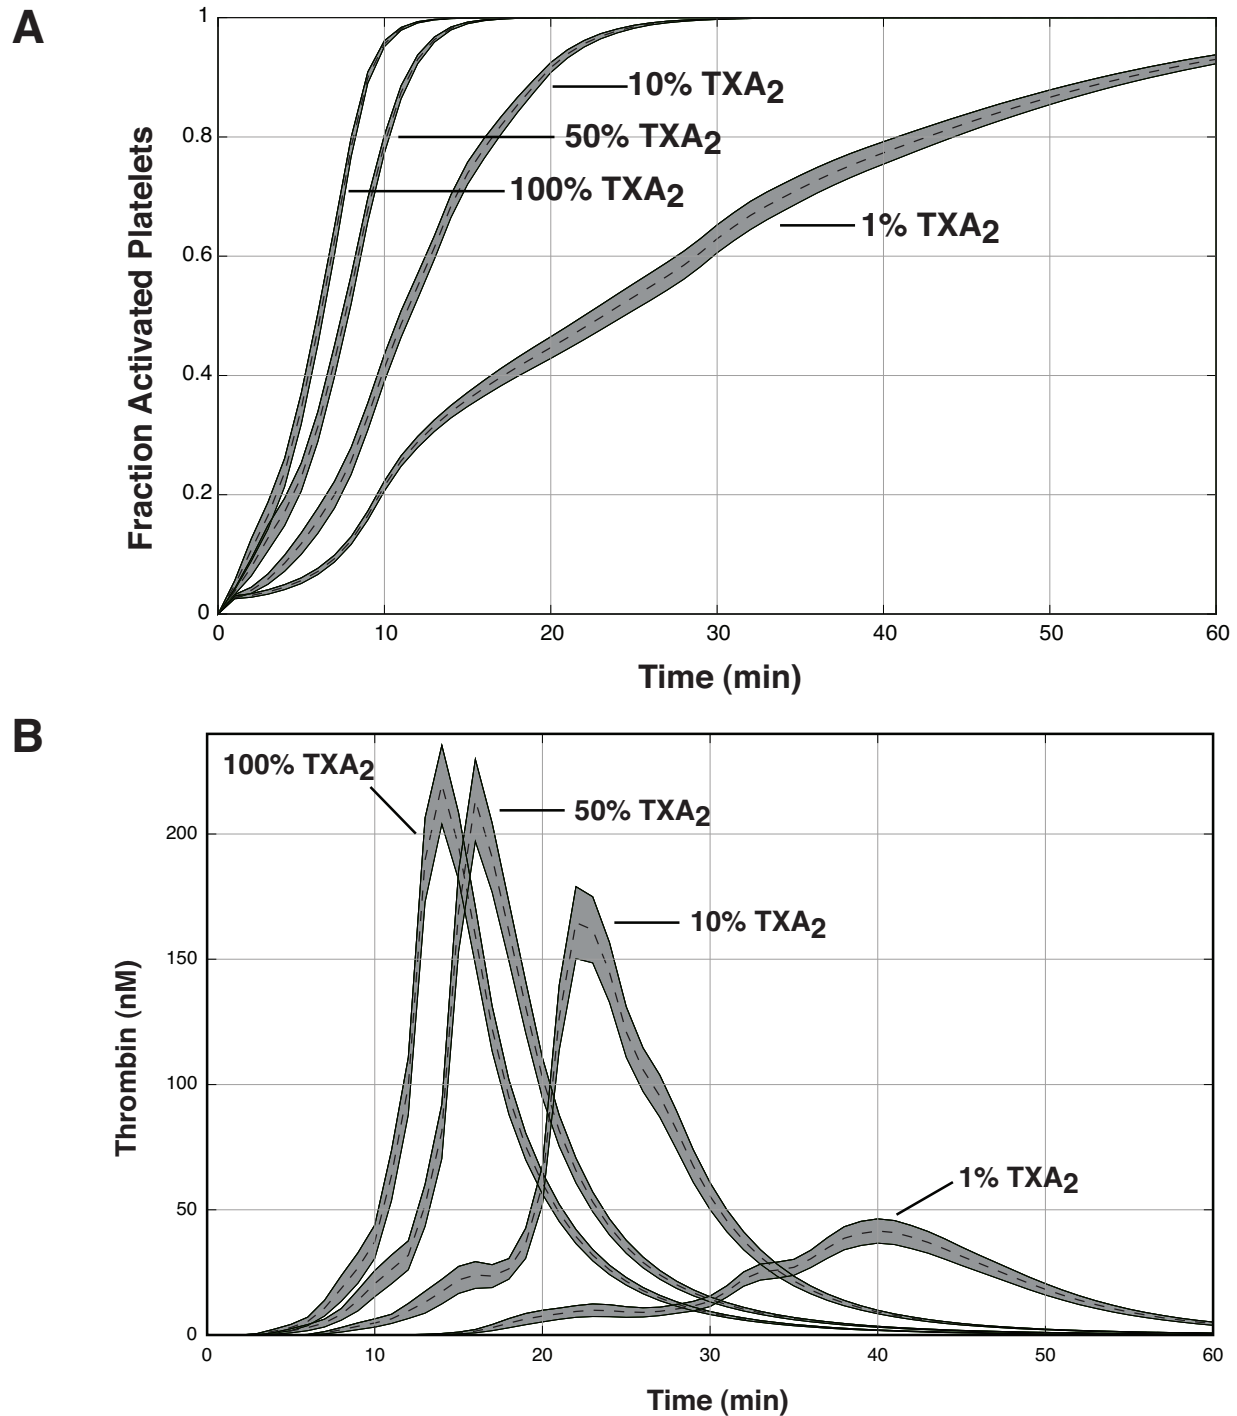

**Fig. S3:** Simulation of the effect of aspirin on platelet activation. for the CAD patient samples. **A:** Fraction of activated platelets versus time as a function of the level of TXA<sub>2</sub> secretion inhibition. **B:** Thrombin concentration versus time as a function of the level of TXA<sub>2</sub> secretion inhibition. To simulate the effect of aspirin, the rate of TXA<sub>2</sub> secretion from platelets was reduced all other parameters held constant. The fraction of the nominal secretion rate constant is shown along with the 95% confidence estimate of the value of the mean. Significant reduction in the production of TXA<sub>2</sub> reduced the rate of platelet activation and thrombin formation. However, moderate levels of TXA<sub>2</sub> reduction, while non-negligible, do not qualitatively alter the thrombin or platelet activation profile.
